# Supplementary material for: A Pyroptosis-Related Gene Signature to Predict Patients' Prognosis and Immune Landscape in Liver Hepatocellular Carcinoma
Source: PubMed Central journal article supplement (PMC8886769; doi:10.1155/2022/1258480), 2022-02-16
Supplement: 1258480.f1.pdf [file 1258480.f1.pdf]

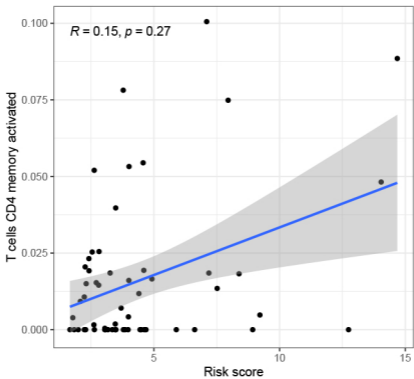

(a)

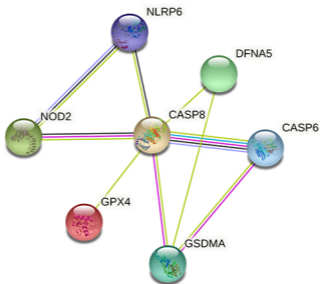

(b)
